# Supplementary material for: Effective adsorption of In(iii) from hydrochloric acid solution using hyperbranched polyethyleneimine and sodium chloroacetate modified weakly acidic macroporous resin
Source: Royal Society of Chemistry journal article supplement (doi:10.1039/d2nj05775a), 2023-01-01
Supplement: d2nj05775a1.pdf [file d2nj05775a1.pdf]

# Effective adsorption of In(III) from hydrochloric acid solution using hyperbranched polyethyleneimine and sodium chloroacetate modified weakly acidic macroporous resin

Xuezhen Gao, <sup>\*a</sup> Zhiyong Cao, <sup>a</sup> Junshen Liu<sup>\*a</sup> and Beibei Zhang <sup>a</sup>

<sup>a</sup> Address: School of Chemistry & Materials Science, Ludong University, Yantai 264025, PR China.

\* E-mail: gaoxuez@163.com (Z. Gao); liujunshen@163.com (J. LIU), Fax: +86 535 6697537.

## Contents

### 1. Determination of the cation exchange capacity of CM-HPEI-HD-1

### 2. Determination of the anion exchange capacity of HPEI-HD-1

**Table. S1.** The ion exchange capacity of HPEI-HD-1 and CM- HPEI-HD-1.

**Fig. S1.** N 1s spectra of adsorbents.

### 1. Determination of the anion exchange capacity of HPEI-HD-1

Take 0.25 g of HPEI-HD-1 into a flask and add 30mL of 0.1 mol/L HCl solution. Then the mixture was placed at 40 °C for 6 h. After the reaction, 10 mL of filtrate was taken and titrated with 0.1 mol/L NaOH solution using phenolphthalein as indicator. The anion exchange capacity (IEC, mmol/g) of the HPEI-HD-1 was calculated using the following Equation (S1).

$$\text{IEC} = \frac{3(10 \times C_{\text{HCl}} - C_{\text{NaOH}} V_{\text{NaOH}})}{m} \quad (\text{S1})$$

Where,  $C_{\text{NaOH}}$  and  $C_{\text{HCl}}$  are the concentration of NaOH solution and HCl solution, respectively, mol/L;  $V_{\text{NaOH}}$  is the volume of NaOH solution used for the measured filtrate, respectively, mL;  $m$  is adsorbent mass, g.

### 2. Determination of the cation exchange capacity of CM-HPEI-HD-1

0.5g of CM-HPEI-HD-1 and 30 mL of 0.1 mol/L NaOH solution were placed in a flask, and then reacted at 40 °C for 6 h. After the reaction, 10 mL of filtrate was taken and

titrated with 0.1 mol/L HCl solution using methyl orange as indicator. The cation exchange capacity (IEC, mmol/g) of the CM-HPEI-HD-1 was calculated using the following equation (S2).

$$\text{IEC} = \frac{3(10 \times C_{\text{NaOH}} - C_{\text{HCl}} V_{\text{HCl}})}{m} \quad (\text{S2})$$

Where,  $C_{\text{NaOH}}$  and  $C_{\text{HCl}}$  are the concentration of NaOH solution and HCl solution, respectively, mol/L;  $V_{\text{HCl}}$  is the volume of HCl solution used for the measured filtrate, respectively, mL;  $m$  is adsorbent mass, g.

**Table S1** The ion exchange capacity of HPEI-HD-1 and CM- HPEI-HD-1.

| Sample       | IEC (mmol/L) |
|--------------|--------------|
| HPEI-HD-1    | 4.29         |
| CM-HPEI-HD-1 | 1.82         |

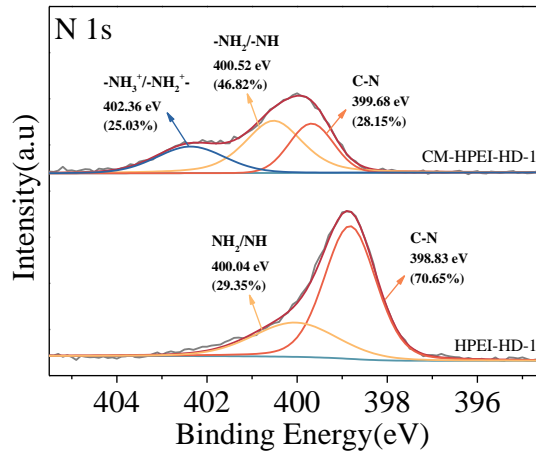

**Fig. S1.** N 1s spectra of adsorbents.
